# Supplementary material for: Global patterns in endemicity and vulnerability of soil fungi
Source: PubMed Central journal article supplement (PMC9826061; doi:10.1111/gcb.16398), 2022-09-02
Supplement: GCB-28-6696-s001.pdf [file GCB-28-6696-s001.pdf]

## Calculation of endemism indices

To estimate endemism at the ecoregion level, we calculated five endemism indices ( $E_1$ - $E_5$ ). Weighted endemism indices were calculated based on these five indices using z-transformation of residuals in regression analyses against sequencing and sampling depth.

### Five endemism indices

$E_1$  Number of endemic species

$$E_1$$

$E_2$  Proportion of endemic species

$$E_2 = \frac{E_1}{S}$$

$S$ , total species richness in ecoregion

$E_3$  Mean maximum range of species (average weighted endemism; Crisp et al. 2001)

$$E_3 = \frac{\sum_i d_i}{S}$$

$d_i$ , range of species  $i$

$E_4$  Jaccard index of similarity (Jaccard 1912)

$$E_4(C_1, C_2) = \frac{C_1 \cap C_2}{C_1 \cup C_2}$$

$C$ , ecoregion communities

$E_5$   $\beta_{SIM}$  index of similarity (multiple-site Simpson-based community similarity index, Baselga et al. 2010)

$$E_5 = \frac{\sum_{i < j} \min(b_{ij}, b_{ji})}{\sum_i (S_i - S_T) + \sum_{i < j} \min(b_{ij}, b_{ji})}$$

$S_i$ , number of species in site  $i$

$S_T$ , total number of species

$b_{ij}$  and  $b_{ji}$ , number of species exclusive to sites  $i$  and  $j$ , respectively

### Accounting for sampling and sequencing depth for endemism indices

$E_{nR}$  residuals of  $n$  endemism index

$$E_{nR} = E_n - \hat{E}_n; \\ \hat{E}_n = \beta_1 \log(L_1 + L_2) + \beta_2 \log(R_1 + R_2) + \beta_3 \log(L_1) + \beta_4 \log(L_2) + \beta_5 \log(R_1) + \beta_6 \log(R_2) + \beta_7(L_1 + L_2) + \beta_8(R_1 + R_2) + \beta_9 L_1 + \beta_{10} L_2 + \beta_{11} R_1 + \beta_{12} R_2 + \epsilon$$

$L_1$ , number of soil sampling localities

$L_2$ , number of UNITE localities

$R_1$ , number of reads of soil samples

$R_2$ , number of UNITE Sanger reads

Residuals are calculated based on the best-fitting model.

### Standardizing residuals of endemism indices

$E_{nRz}$  Z-transformed  $E_{nR}$

$$E_{nRz} = \frac{E_{nR} - \mu}{\sigma}$$

$\mu$ , mean  $E_{nR}$

$\sigma$ , standard deviation of  $E_{nR}$ .

### Weighting standardised endemism indices

$E_{ave}$  weighted  $E_{nRz}$

$$E_{ave} = \frac{E_{1Rz} + E_{2Rz} + 2E_{3Rz} + E_{4Rz} + E_{5Rz}}{6}$$

$E_3$  receives double weight, because  $E_1$  and  $E_2$  as well as  $E_3$  and  $E_4$  are calculated on a similar basis.

### Correlation matrix of endemism indices

|           | $E_{ave}$ | $E_{1Rz}$ | $E_{2Rz}$ | $E_{3Rz}$ | $E_{4Rz}$ | $E_{5Rz}$ |
|-----------|-----------|-----------|-----------|-----------|-----------|-----------|
| $E_{ave}$ | 1.000     | 0.767     | 0.805     | 0.554     | 0.754     | 0.816     |
| $E_{1Rz}$ | 0.767     | 1.000     | 0.806     | 0.188     | 0.452     | 0.540     |
| $E_{2Rz}$ | 0.805     | 0.806     | 1.000     | 0.072     | 0.788     | 0.745     |
| $E_{3Rz}$ | 0.554     | 0.188     | 0.072     | 1.000     | 0.169     | 0.270     |
| $E_{4Rz}$ | 0.754     | 0.452     | 0.788     | 0.169     | 1.000     | 0.782     |
| $E_{5Rz}$ | 0.816     | 0.540     | 0.745     | 0.270     | 0.782     | 1.000     |

### Correlation matrix of average endemism of fungal groups

|                            | 1     | 2     | 3     | 4     | 5     | 6     | 7     | 8     | 9     |
|----------------------------|-------|-------|-------|-------|-------|-------|-------|-------|-------|
| all fungi (1)              | 1.000 | 0.797 | 0.591 | 0.517 | 0.568 | 0.628 | 0.675 | 0.619 | 0.523 |
| non-EcM Agaricomycetes (2) | 0.797 | 1.000 | 0.790 | 0.398 | 0.461 | 0.470 | 0.460 | 0.595 | 0.532 |
| AM fungi (3)               | 0.591 | 0.790 | 1.000 | 0.280 | 0.375 | 0.232 | 0.233 | 0.578 | 0.461 |
| EcM fungi (4)              | 0.517 | 0.398 | 0.280 | 1.000 | 0.234 | 0.268 | 0.250 | 0.270 | 0.176 |
| molds (5)                  | 0.568 | 0.461 | 0.375 | 0.234 | 1.000 | 0.600 | 0.413 | 0.364 | 0.513 |
| OHP (6)                    | 0.628 | 0.470 | 0.232 | 0.268 | 0.600 | 1.000 | 0.809 | 0.159 | 0.354 |
| pathogens (7)              | 0.675 | 0.460 | 0.233 | 0.250 | 0.413 | 0.809 | 1.000 | 0.264 | 0.331 |
| unicellular fungi (8)      | 0.619 | 0.595 | 0.578 | 0.270 | 0.364 | 0.159 | 0.264 | 1.000 | 0.463 |
| yeasts (9)                 | 0.523 | 0.532 | 0.461 | 0.176 | 0.513 | 0.354 | 0.331 | 0.463 | 1.000 |

## References

- Baselga, A. (2010). Partitioning the turnover and nestedness components of beta diversity. *Global Ecology and Biogeography*, 19, 134-143.
- Jaccard, P. (1912). The distribution of the flora in the alpine zone. *New Phytologist*, 11, 37-50.

BOX S1. Calculation of endemism indices and correlation among standardised indices for all fungi and among functional groups.
